# Supplementary material for: Palmitoleic Acid (N-7) Attenuates the Immunometabolic Disturbances Caused by a High-Fat Diet Independently of PPARα
Source: Hindawi journal article supplement (doi:10.1155/2014/582197), 2014-01-01
Supplement: f1 [file 582197.f1.pdf]

SUPPLEMENTARY RESULTS

**Table S1. Effects of different genotypes about peripheral parameters. Body weight (BW), tissues weight and serum levels of triacylglycerol, total cholesterol, HDL, estimate LDL, fasting glycemia, aspartate transaminase and triacylglycerol levels in liver of wild type (WT) and PPAR $\alpha$  knockout (KO) mice fed with a standard diet (SD).**

|                                  | WT SD  |       |   | KO SD    |       |   |
|----------------------------------|--------|-------|---|----------|-------|---|
|                                  | Mean   | SEM   | n | Mean     | SEM   | n |
| Inicial body weight (g)          | 27,04  | 0,45  | 6 | 26,14    | 0,86  | 4 |
| Final body weight (g)            | 28,66  | 0,73  | 6 | 28,70    | 0,96  | 4 |
| Adiposity index (g)              | 1,33   | 0,20  | 6 | 1,15     | 0,19  | 4 |
| Brown adipose tissue weight (g)  | 0,42   | 0,05  | 6 | 0,41     | 0,06  | 4 |
| Liver weight (g)                 | 1,05   | 0,03  | 6 | 1,06     | 0,06  | 4 |
| Triacylglycerol (mg/dL)          | 87,86  | 10,44 | 4 | 94,29    | 5,23  | 4 |
| Total cholesterol (mg/dL)        | 133,93 | 7,18  | 6 | 160,41   | 7,15  | 4 |
| HDL cholesterol (mg/dL)          | 109,76 | 5,33  | 6 | 117,857* | 8,84  | 4 |
| Estimate LDL (mg/dL)             | 21,28  | 4,25  | 4 | 21,03    | 5,77  | 4 |
| Fasting glucose (mg/dL)          | 130,17 | 13,67 | 6 | 92,50    | 14,89 | 4 |
| AST (mg/dL)                      | 47,54  | 9,75  | 4 | 48,30    | 6,18  | 4 |
| Liver Triacylglycerol (mmol/L/g) | 30,17  | 2,87  | 6 | 38,86    | 8,86  | 4 |

Data are presented as mean  $\pm$  SEM. \*p<0.05 WT SD vs. KO SD (T Test).
